# Supplementary material for: Acyl Quinic Acid Derivatives Screened Out from Carissa spinarum by SOD-Affinity Ultrafiltration LC–MS and Their Antioxidative and Hepatoprotective Activities
Source: MDPI journal article supplement (doi:10.3390/antiox10081302), 2021-08-18
Supplement: s1 [file s1]

## Supporting Information for

# **Acyl quinic acids derivatives screened out from *Carissa spinarum* by SOD-affinity ultrafiltration LC-MS and their antioxidative and hepatoprotective activities**

Ye Liu,<sup>1,2,3</sup> Felix Wambua Muema,<sup>1,2,3,4</sup> Yongli Zhang,<sup>1,2,3</sup> and Mingquan Guo<sup>1,2,3,\*</sup>

<sup>1</sup> CAS Key Laboratory of Plant Germplasm Enhancement and Specialty Agriculture, Wuhan Botanical Garden, Chinese Academy of Sciences, Wuhan 430074, China

<sup>2</sup> Sino-Africa Joint Research Center, Chinese Academy of Sciences, Wuhan 430074, China

<sup>3</sup> Innovation Academy for Drug Discovery and Development, Chinese Academy of Sciences, Shanghai 201203, China

<sup>4</sup> Graduate University of Chinese Academy of Sciences, Beijing 100049, China

\*Corresponding author: CAS Key Laboratory of Plant Germplasm Enhancement and Specialty Agriculture, Wuhan Botanical Garden, Chinese Academy of Sciences, Wuhan 430074, China

orcid.org/0000-0002-6627-5627; Phone: +86-027-87700850;

E-mail: [guomq@wbgcas.cn](mailto:guomq@wbgcas.cn)

## Content

**Figure S1.** (+)-HR-ESI-MS spectrum of **1**

**Figure S2.**  $^1\text{H}$  NMR (600 MHz,  $\text{CD}_3\text{OD}$ ) spectrum of **1**

**Figure S3.**  $^{13}\text{C}$  NMR (150 MHz,  $\text{CD}_3\text{OD}$ ) spectrum of **1**

**Figure S4.** DEPT 135 (150 MHz,  $\text{CD}_3\text{OD}$ ) spectrum of **1**

**Figure S5.** HSQC spectrum of **1** in  $\text{CD}_3\text{OD}$

**Figure S6.**  $^1\text{H}$ - $^1\text{H}$  COSY spectrum of **1** in  $\text{CD}_3\text{OD}$

**Figure S7.** HMBC spectrum of **1** in  $\text{CD}_3\text{OD}$

**Figure S8.** NOESY spectrum of **1** in  $\text{CD}_3\text{OD}$

**Figure S9.** UV spectrum of **1** in  $\text{CD}_3\text{OD}$

**Figure S10.** (+)-HR-ESI-MS spectrum of **2**

**Figure S11.**  $^1\text{H}$  NMR (600 MHz,  $\text{CD}_3\text{OD}$ ) spectrum of **2**

**Figure S12.**  $^{13}\text{C}$  NMR (150 MHz,  $\text{CD}_3\text{OD}$ ) spectrum of **2**

**Figure S13.** DEPT 135 (150 MHz,  $\text{CD}_3\text{OD}$ ) spectrum of **2**

**Figure S14.** HSQC spectrum of **2** in  $\text{CD}_3\text{OD}$

**Figure S15.**  $^1\text{H}$ - $^1\text{H}$  COSY spectrum of **2** in  $\text{CD}_3\text{OD}$

**Figure S16.** HMBC spectrum of **2** in  $\text{CD}_3\text{OD}$

**Figure S17.** NOESY spectrum of **2** in  $\text{CD}_3\text{OD}$

**Figure S18.** UV spectrum of **2** in  $\text{CD}_3\text{OD}$

**Figure S19.** (+)-HR-ESI-MS spectrum of **3**

**Figure S20.**  $^1\text{H}$  NMR (600 MHz,  $\text{CD}_3\text{OD}$ ) spectrum of **3**

**Figure S21.**  $^{13}\text{C}$  NMR (150 MHz,  $\text{CD}_3\text{OD}$ ) spectrum of **3**

**Figure S22.** DEPT 135 (150 MHz,  $\text{CD}_3\text{OD}$ ) spectrum of **3**

**Figure S23.** HSQC spectrum of **3** in  $\text{CD}_3\text{OD}$

**Figure S24.**  $^1\text{H}$ - $^1\text{H}$  COSY spectrum of **3** in  $\text{CD}_3\text{OD}$

**Figure S25.** HMBC spectrum of **3** in  $\text{CD}_3\text{OD}$

**Figure S26.** NOESY spectrum of **3** in  $\text{CD}_3\text{OD}$

**Figure S27.** UV spectrum of **3** in  $\text{CD}_3\text{OD}$

**Figure S28.** ROS production of compounds **4**, **6–11** and positive control vitamin C at 5  $\mu\text{M}$  in  $\text{H}_2\text{O}_2$ -induced L02 cell injury model shown in fluorescence images photographed by cell imaging multi-mode reader (Cytation 1, BioTek; scale bar: 500  $\mu\text{m}$ , 4  $\times$ )

**Figure S1.** (+)-HR-ESI-MS spectrum of **1**

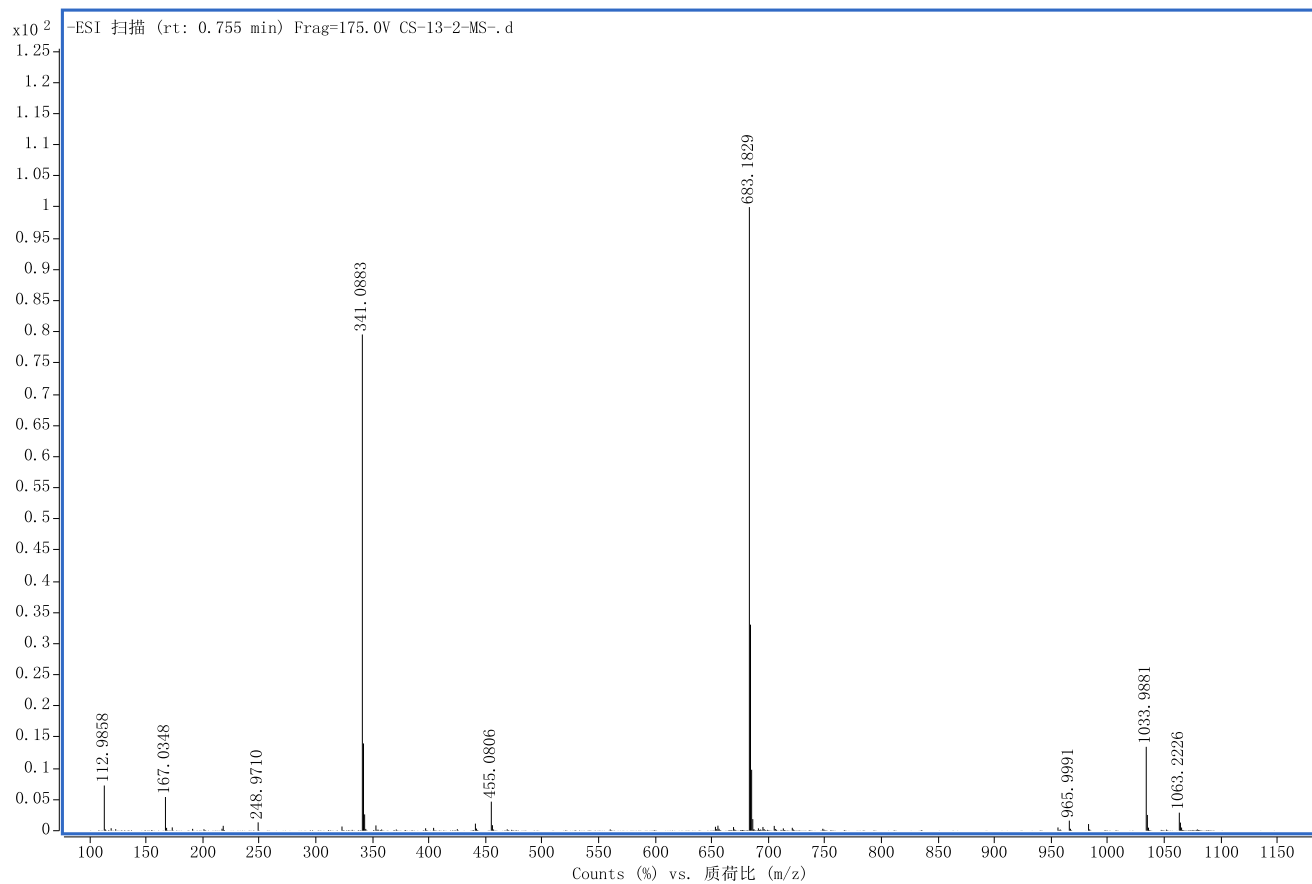

**Figure S2.**  $^1\text{H}$  NMR (600 MHz,  $\text{CD}_3\text{OD}$ ) spectrum of **1**

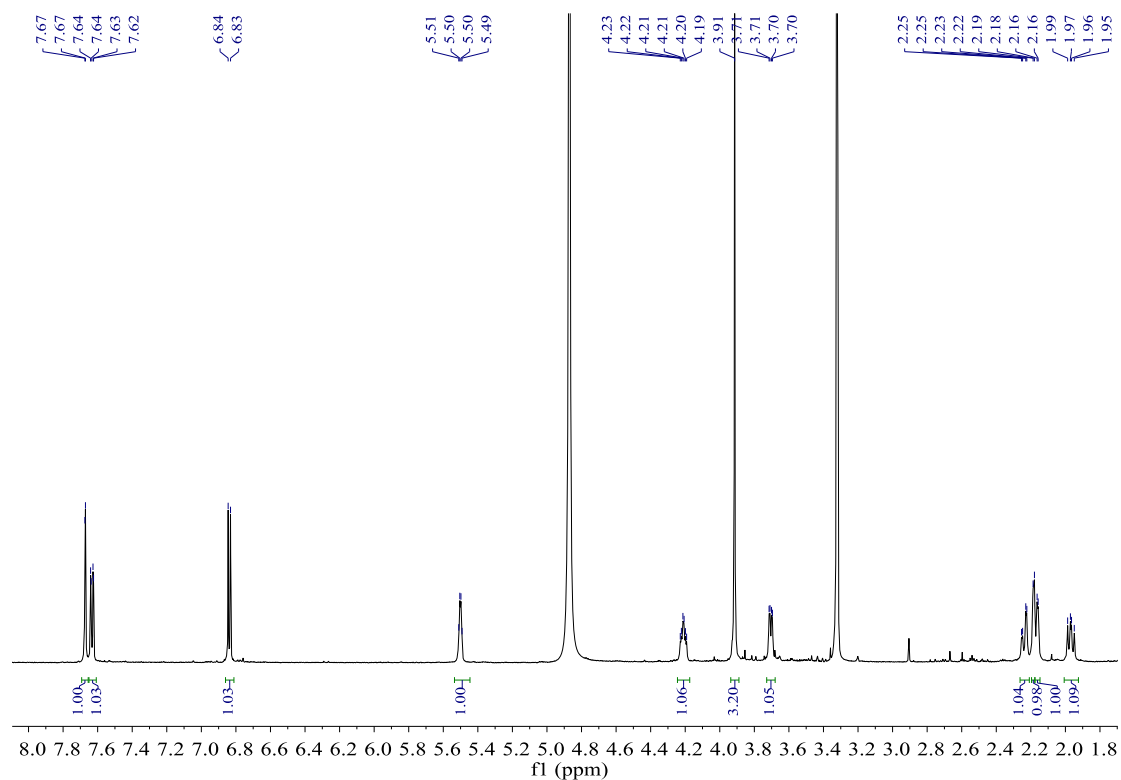

**Figure S3.**  $^{13}\text{C}$  NMR (150 MHz,  $\text{CD}_3\text{OD}$ ) spectrum of **1**

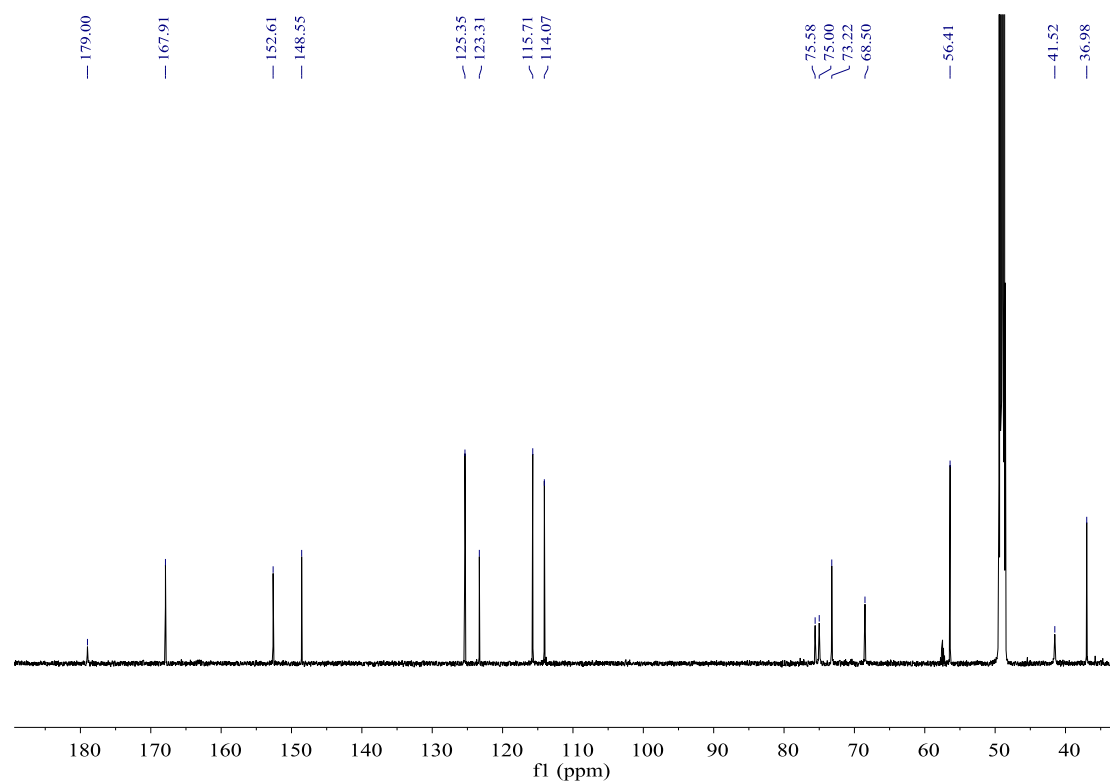

**Figure S4.** DEPT 135 (150 MHz,  $\text{CD}_3\text{OD}$ ) spectrum of **1**

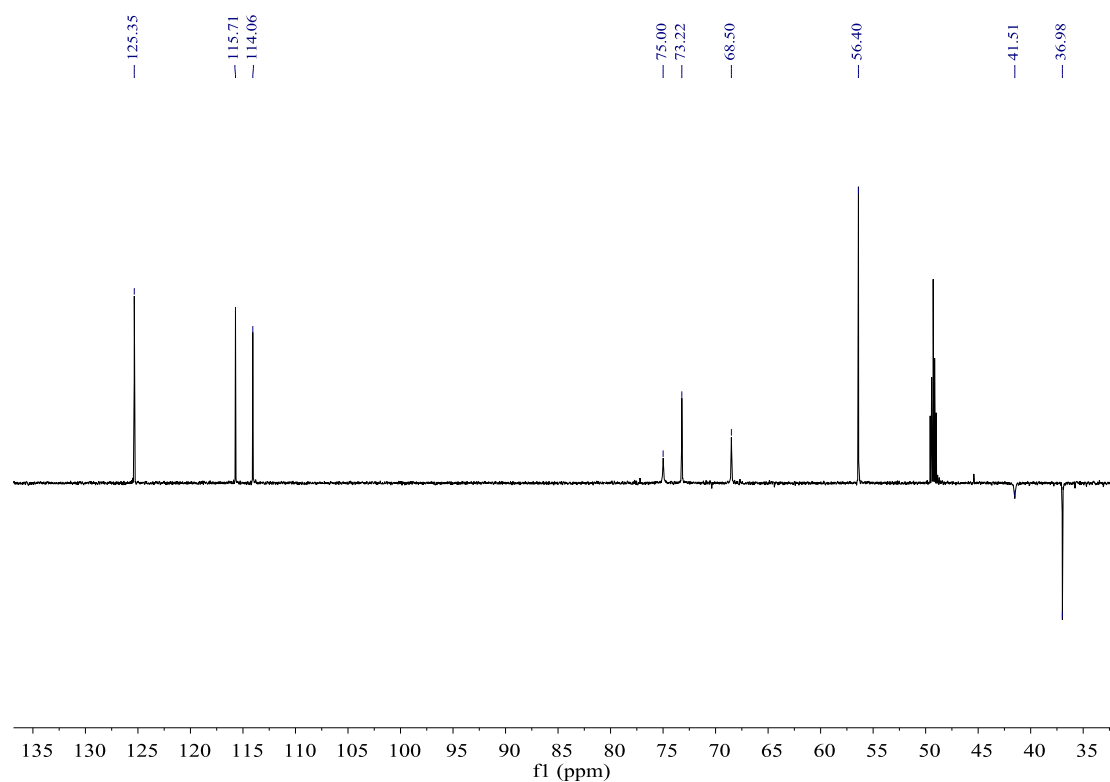

**Figure S5.** HSQC spectrum of **1** in CD<sub>3</sub>OD

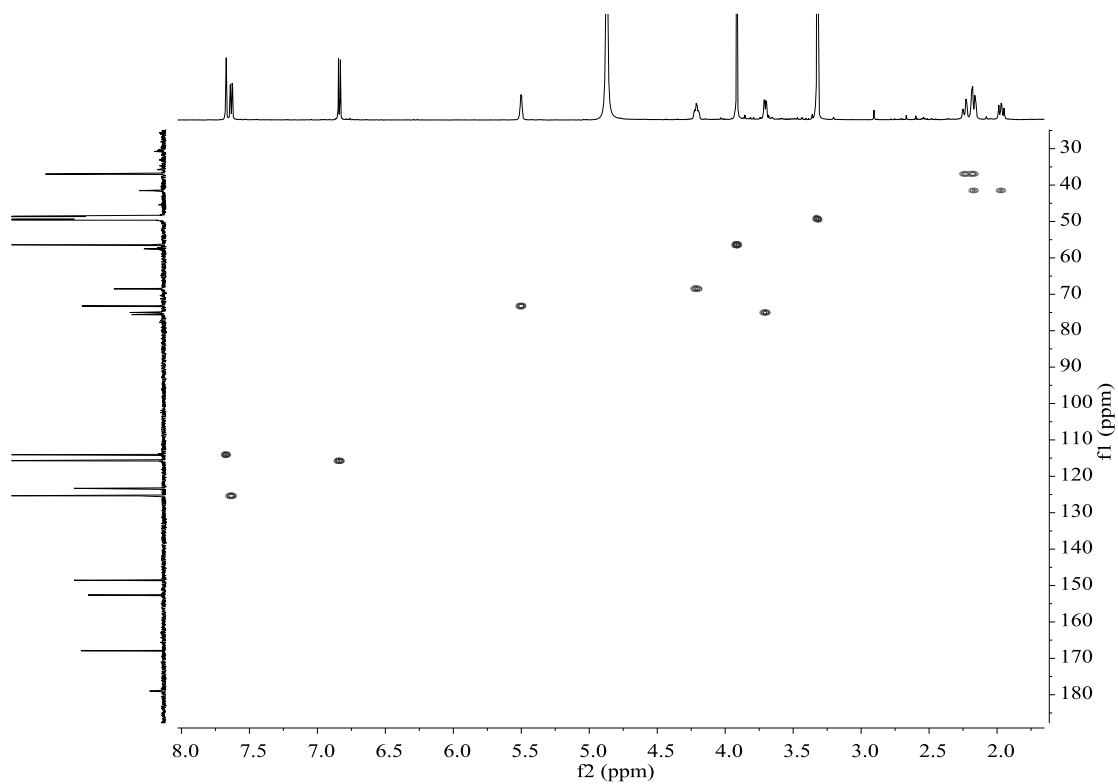

**Figure S6.** <sup>1</sup>H-<sup>1</sup>H COSY spectrum of **1** in CD<sub>3</sub>OD

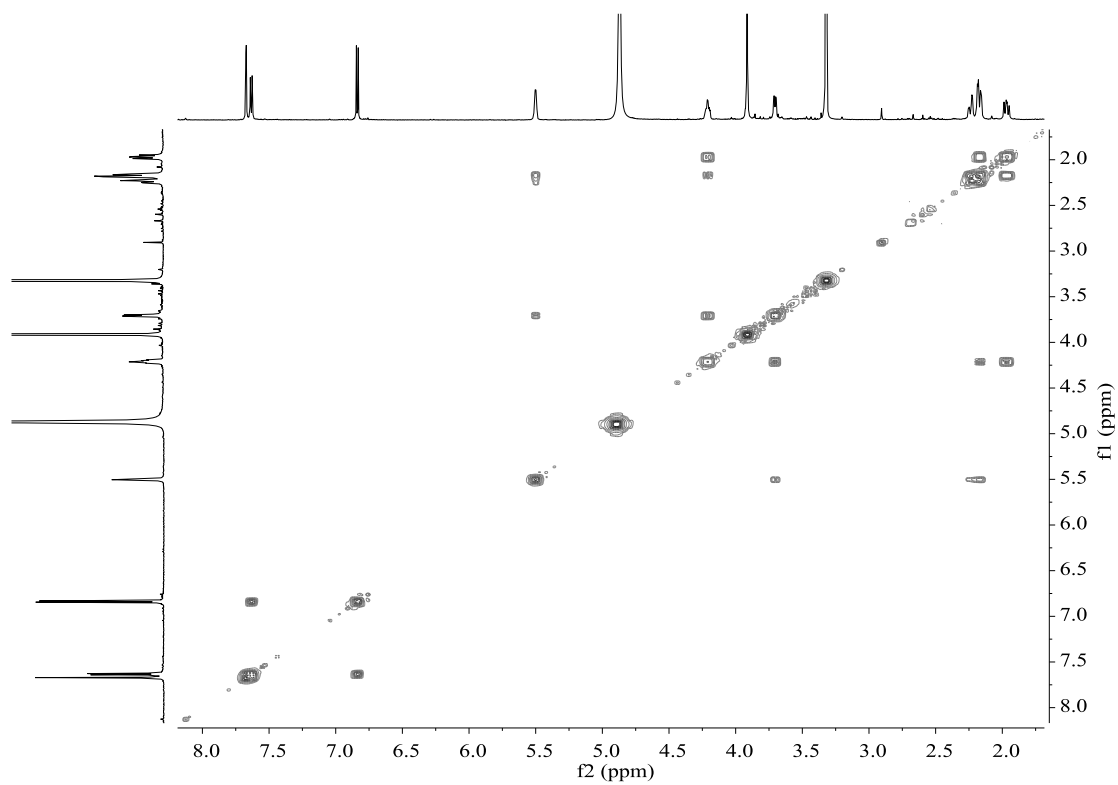

**Figure S7.** HMBC spectrum of **1** in CD<sub>3</sub>OD

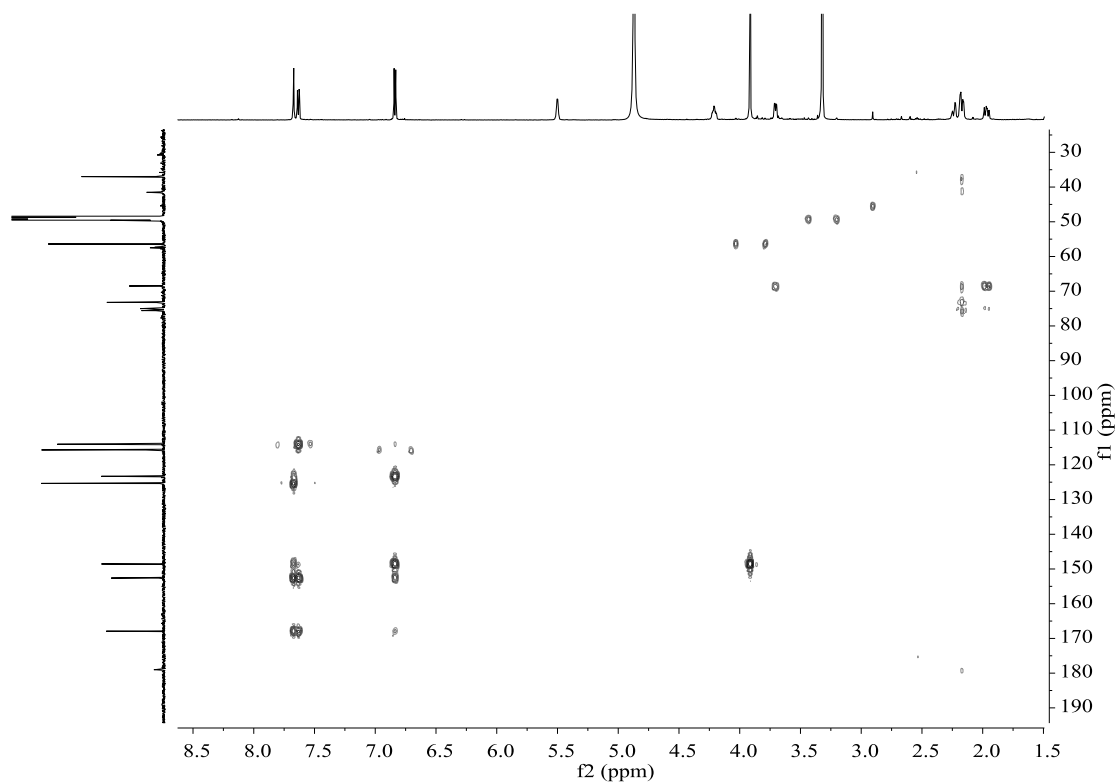

**Figure S8.** NOESY spectrum of **1** in CD<sub>3</sub>OD

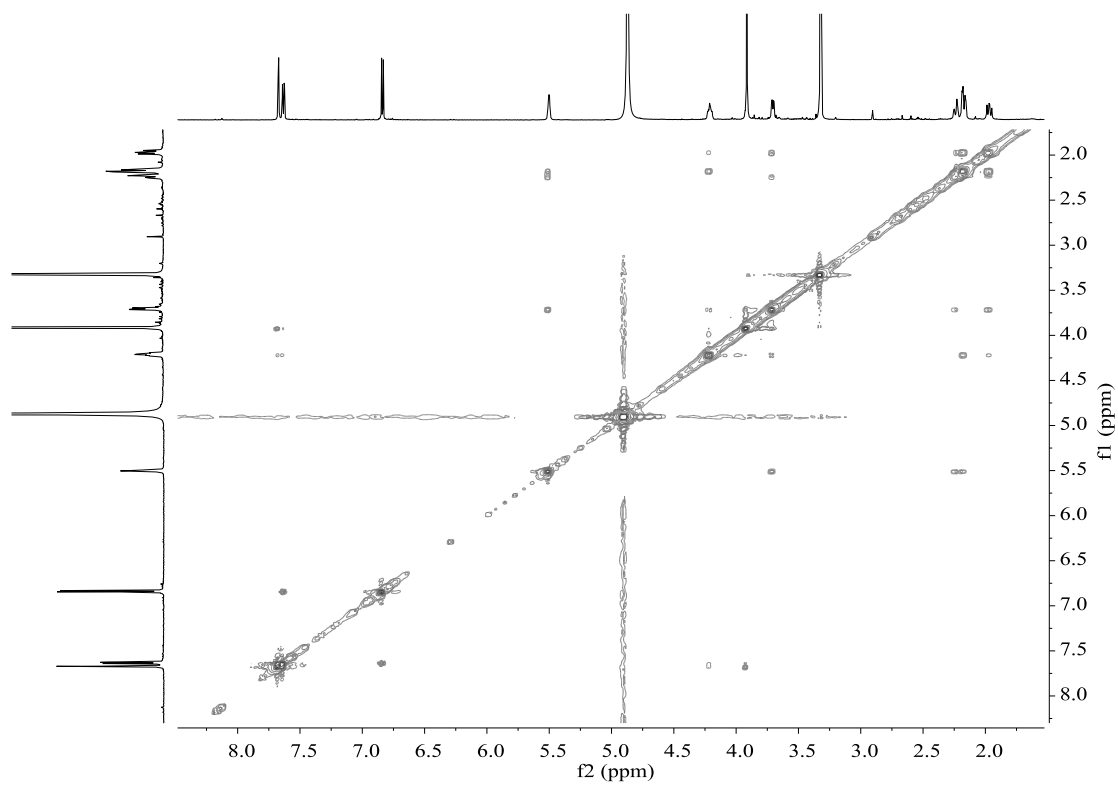

**Figure S9.** UV spectrum of **1** in CD<sub>3</sub>OD

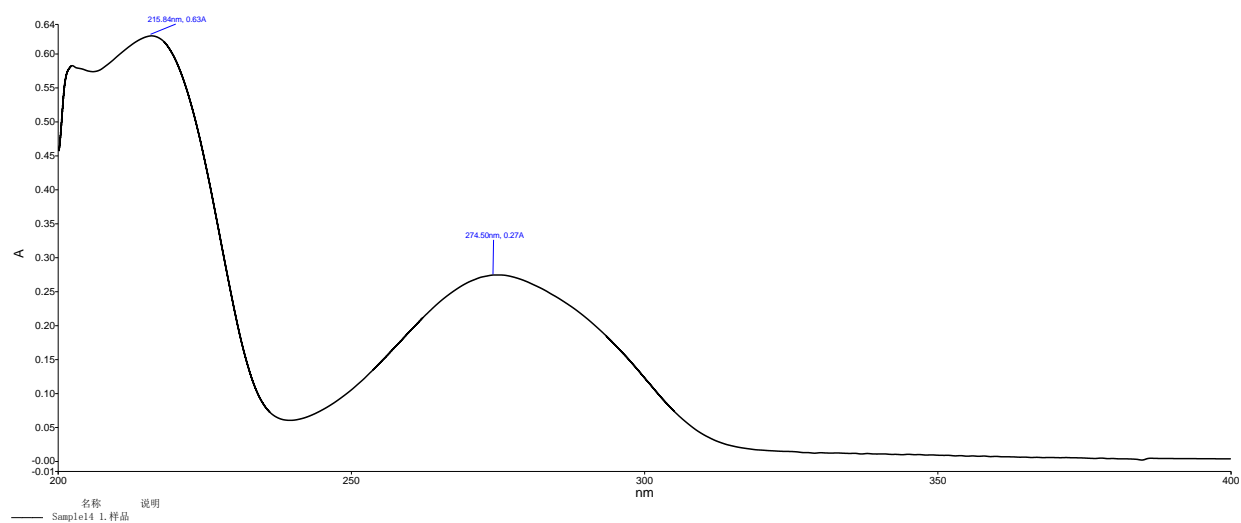

**Figure S10.** (+)-HR-ESI-MS spectrum of **2**

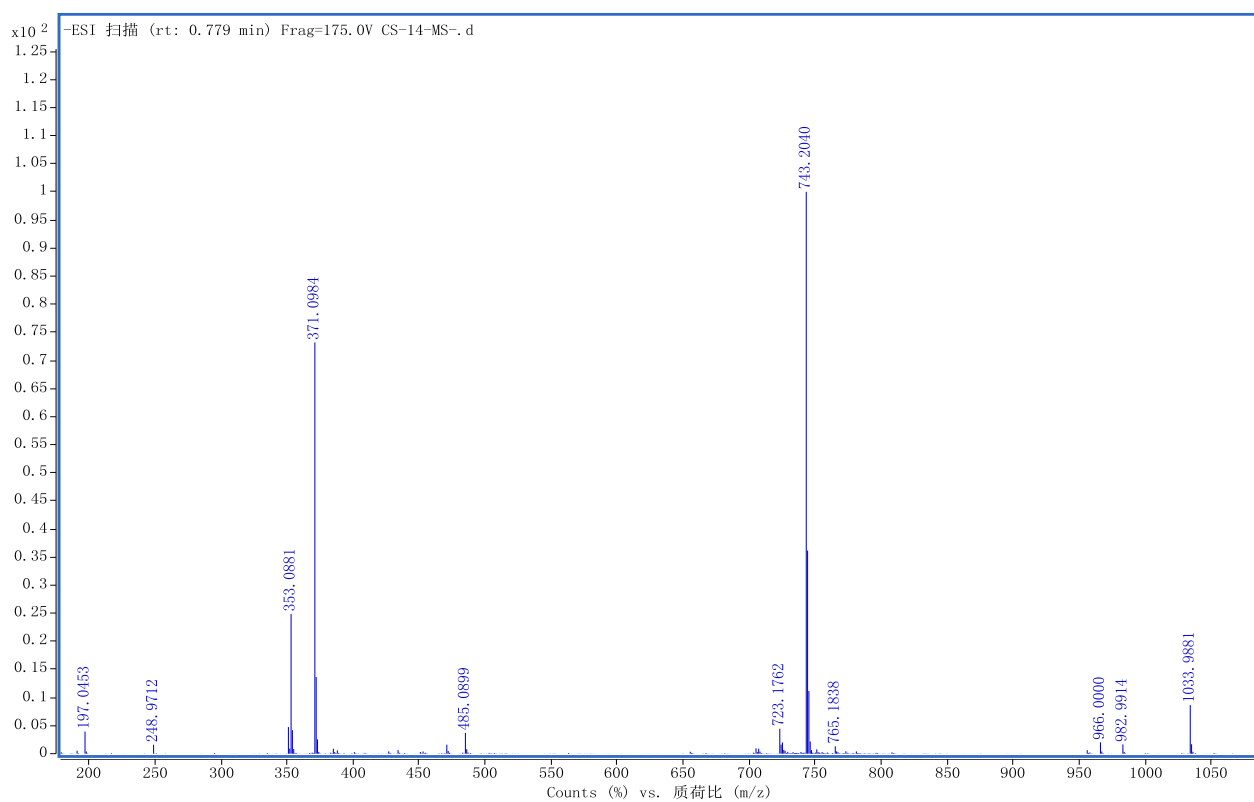

**Figure S11.**  $^1\text{H}$  NMR (600 MHz,  $\text{CD}_3\text{OD}$ ) spectrum of **2**

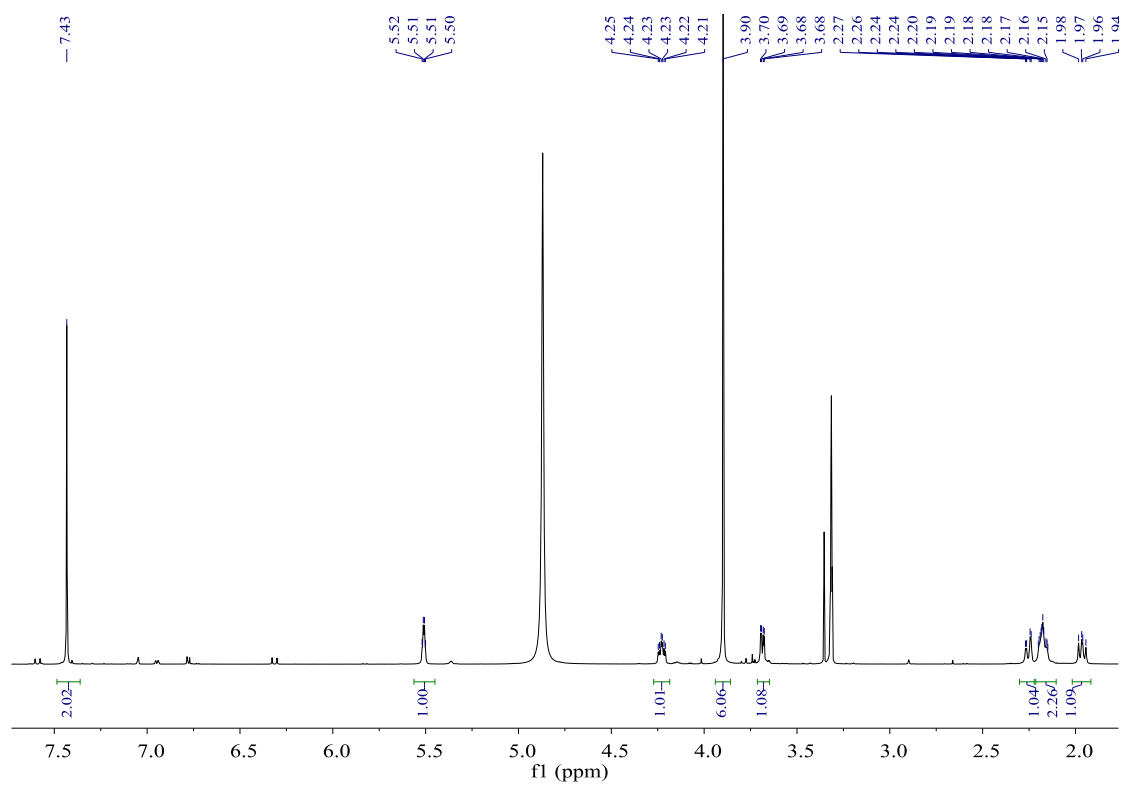

**Figure S12.**  $^{13}\text{C}$  NMR (150 MHz,  $\text{CD}_3\text{OD}$ ) spectrum of **2**

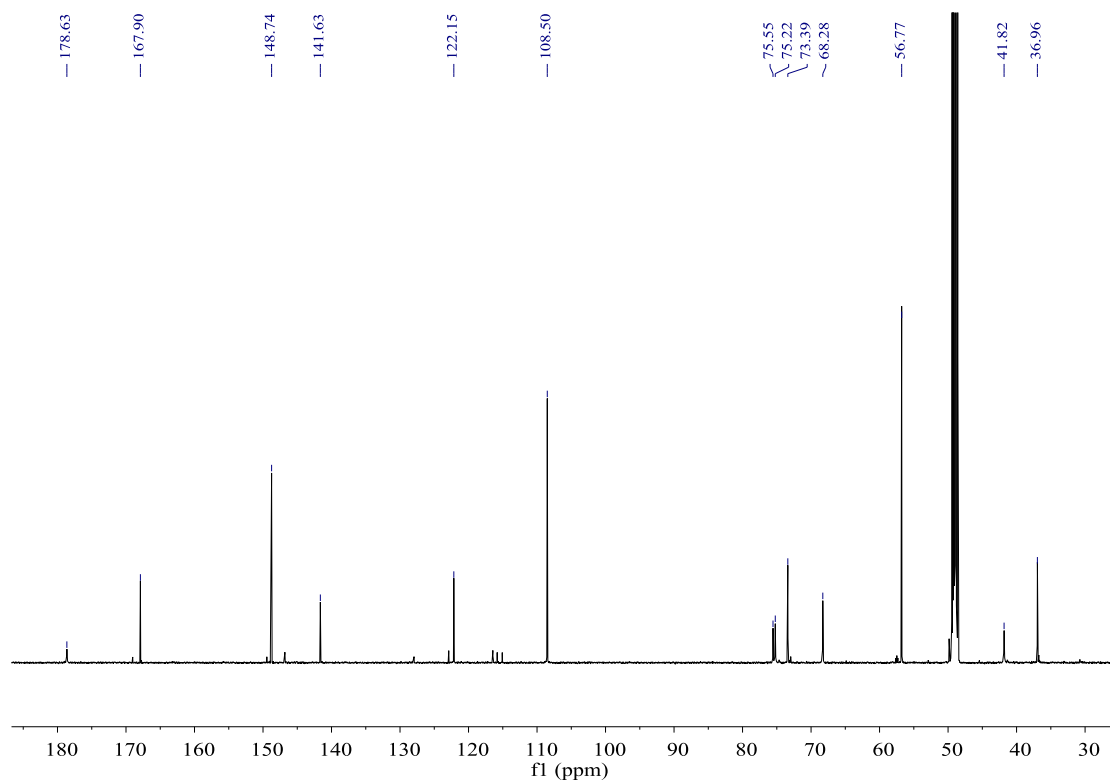



**Figure S13.** DEPT 135 (150 MHz, CD<sub>3</sub>OD) spectrum of **2**

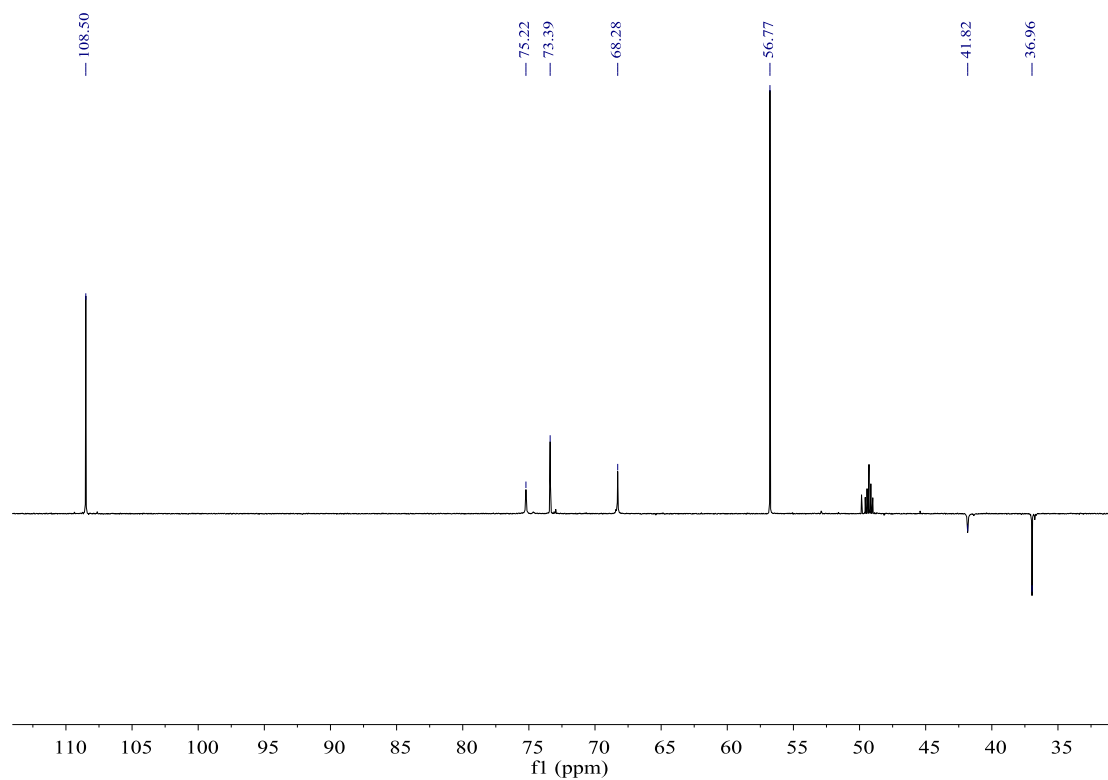

**Figure S14.** HSQC spectrum of **2** in CD<sub>3</sub>OD

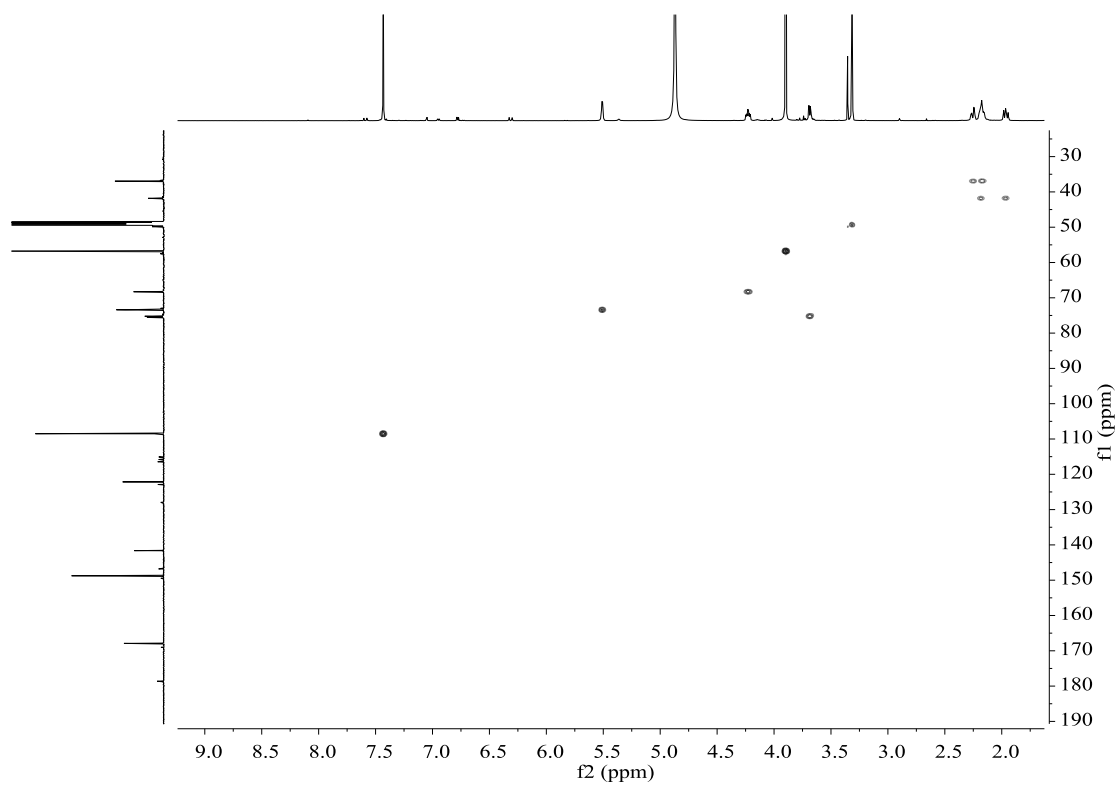

**Figure S15.**  $^1\text{H}$ - $^1\text{H}$  COSY spectrum of **2** in  $\text{CD}_3\text{OD}$

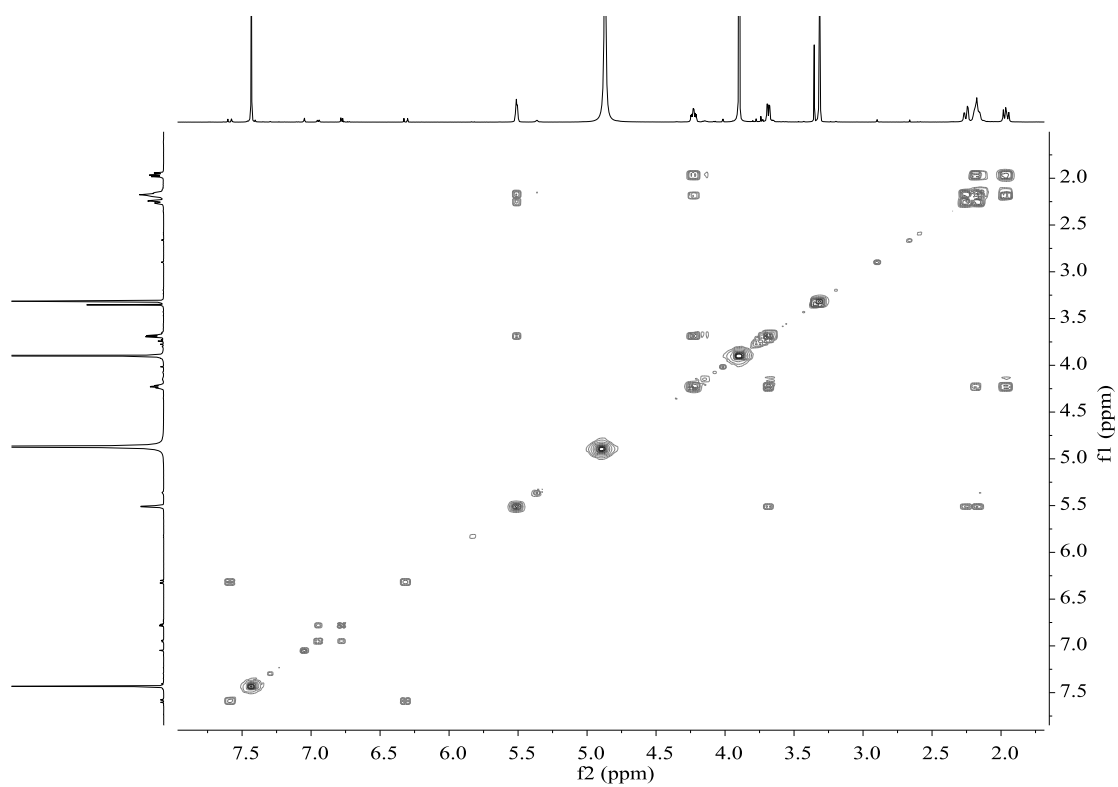

**Figure S16.** HMBC spectrum of **2** in  $\text{CD}_3\text{OD}$

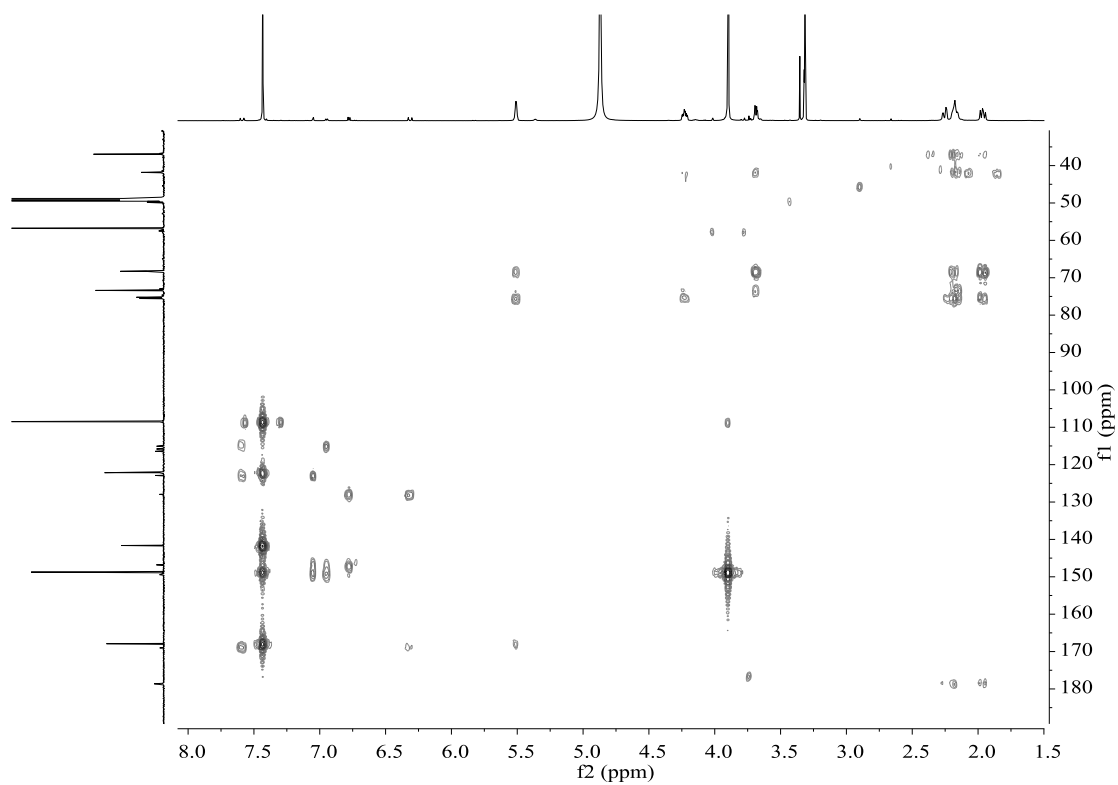

**Figure S17.** NOESY spectrum of **2** in CD<sub>3</sub>OD

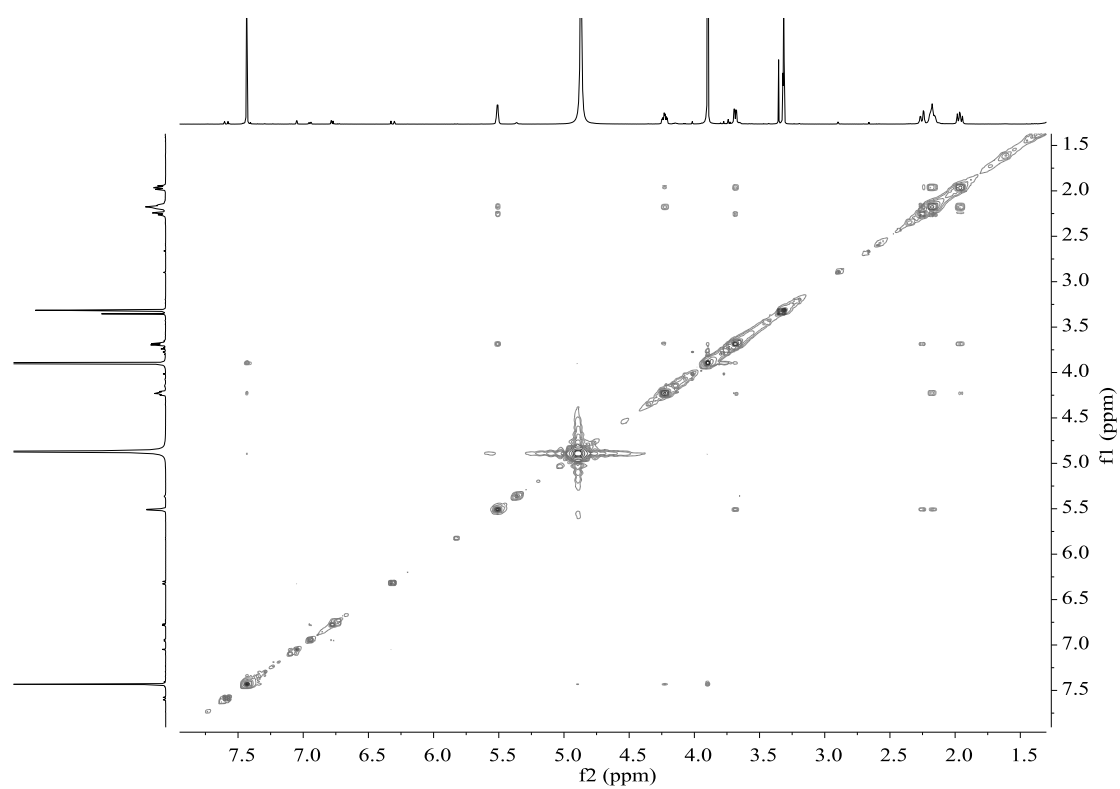

**Figure S18.** UV spectrum of **2** in CD<sub>3</sub>OD

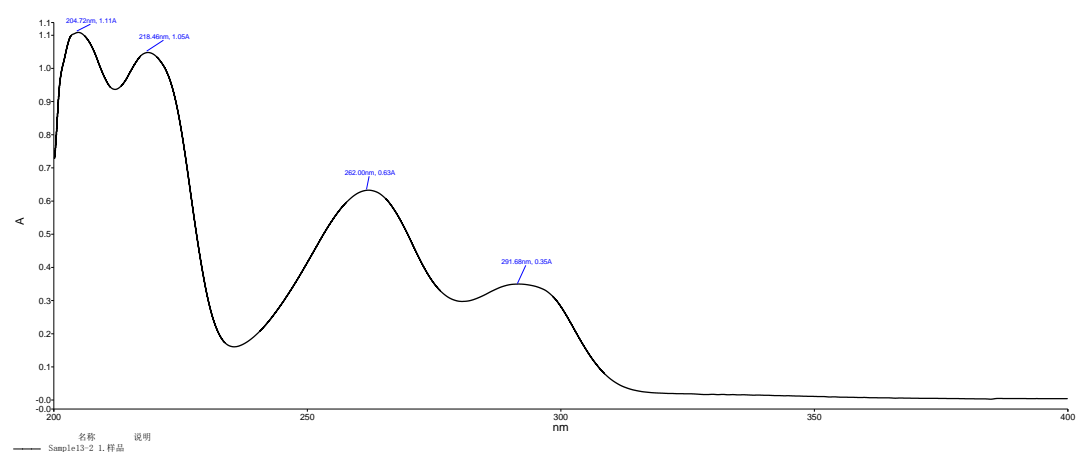

**Figure S19.** (+)-HR-ESI-MS spectrum of **3**

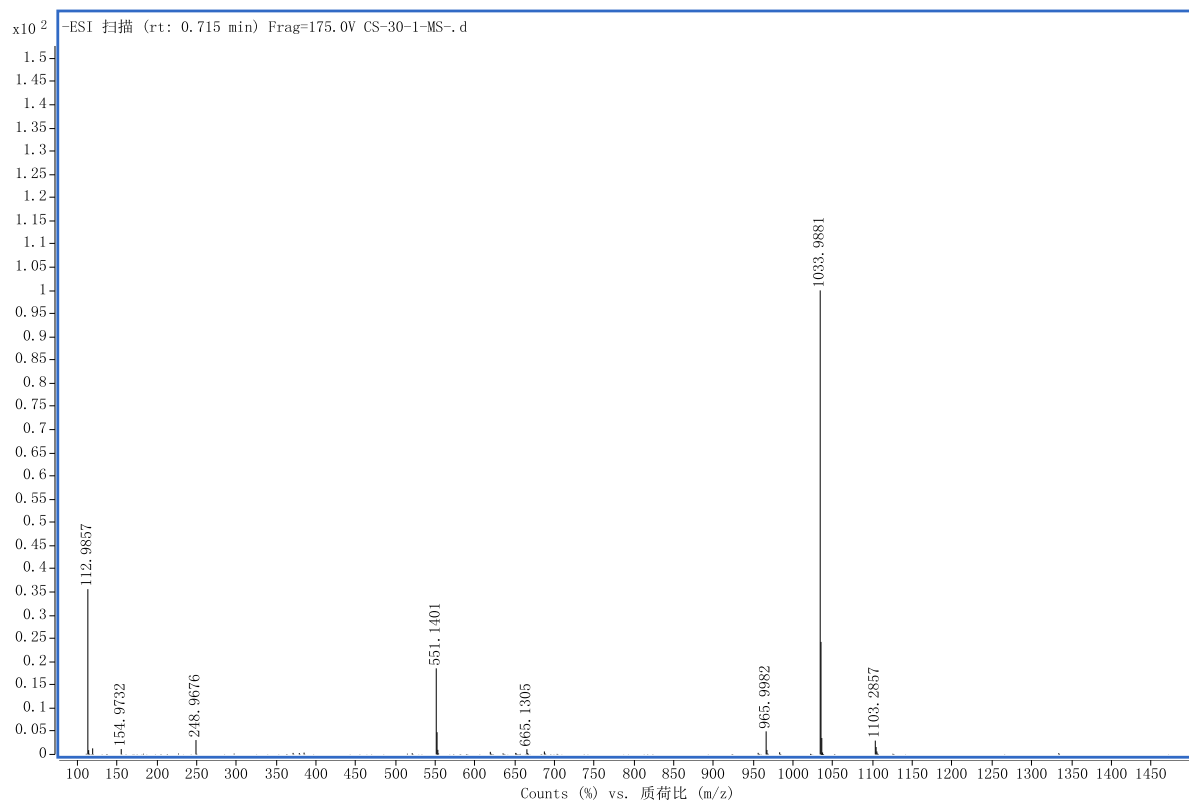

**Figure S20.**  $^1\text{H}$  NMR (600 MHz,  $\text{CD}_3\text{OD}$ ) spectrum of **3**

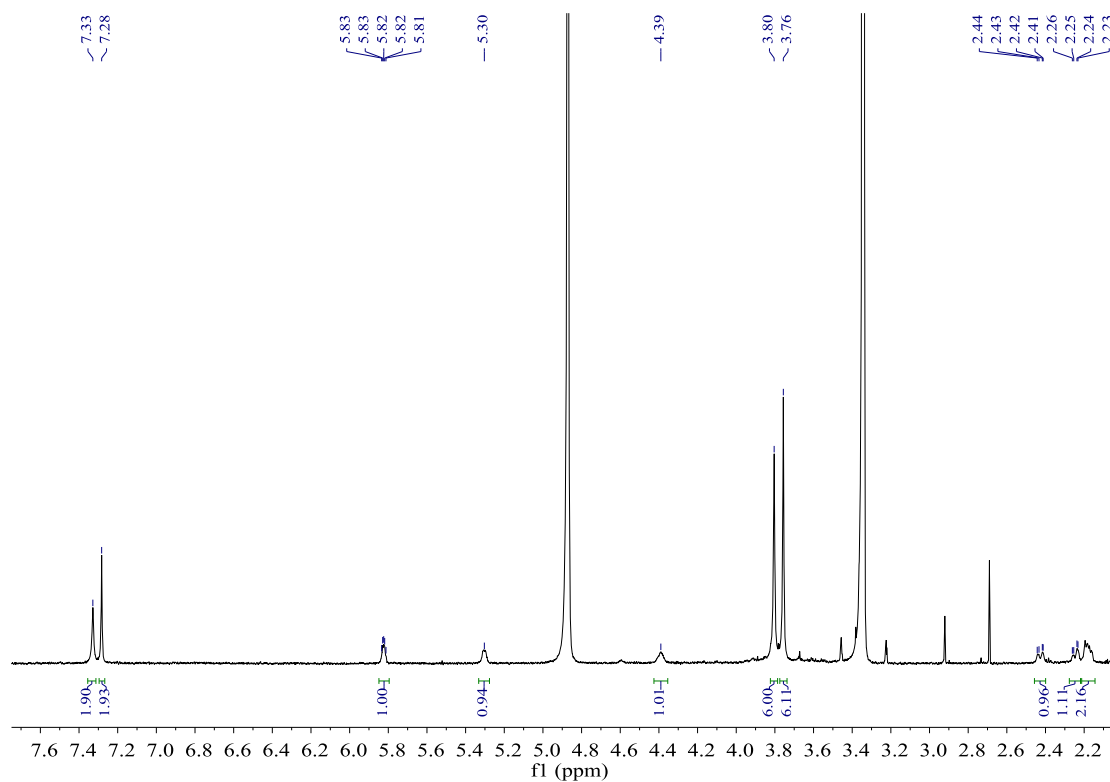

**Figure S21.**  $^{13}\text{C}$  NMR (150 MHz,  $\text{CD}_3\text{OD}$ ) spectrum of **3**

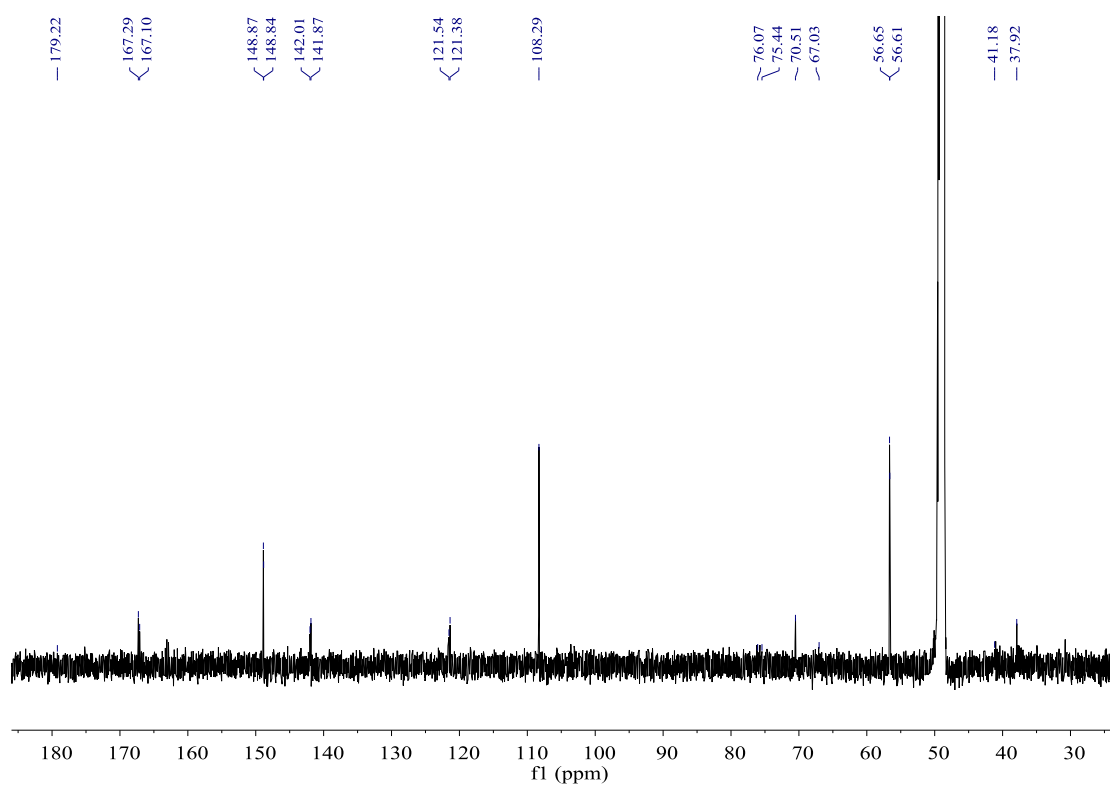

**Figure S22.** DEPT 135 (150 MHz,  $\text{CD}_3\text{OD}$ ) spectrum of **3**

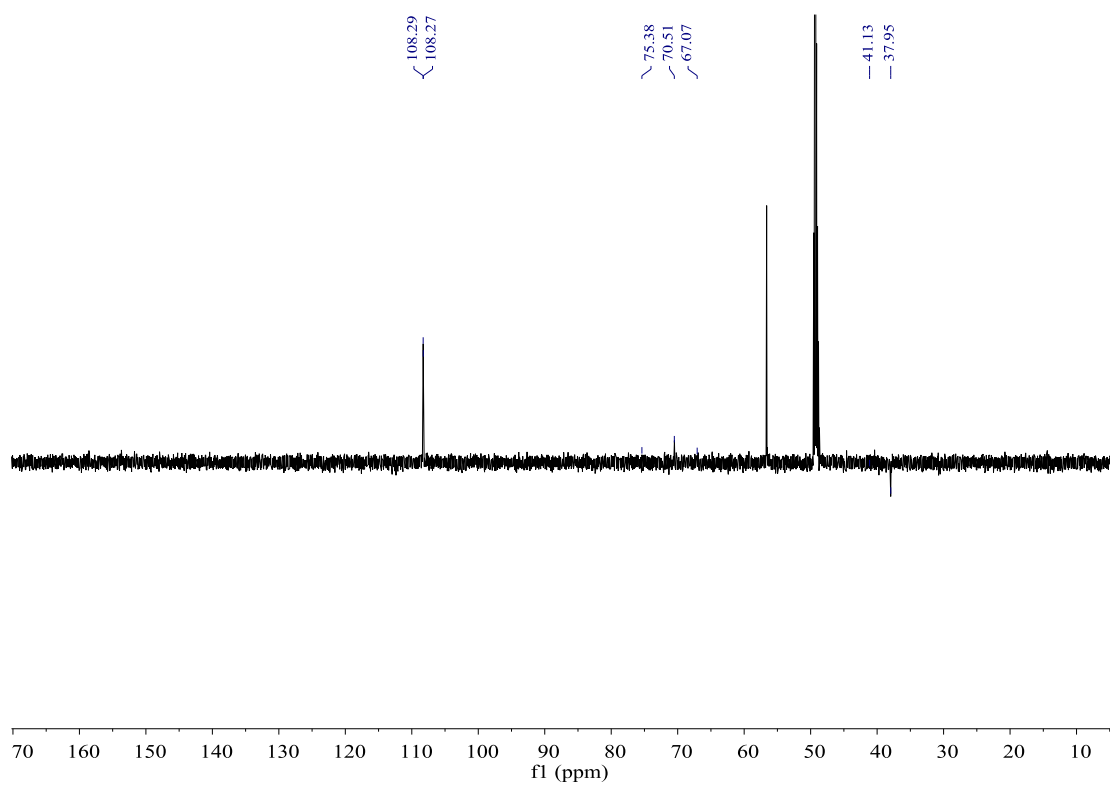

**Figure S23.** HSQC spectrum of **3** in CD<sub>3</sub>OD

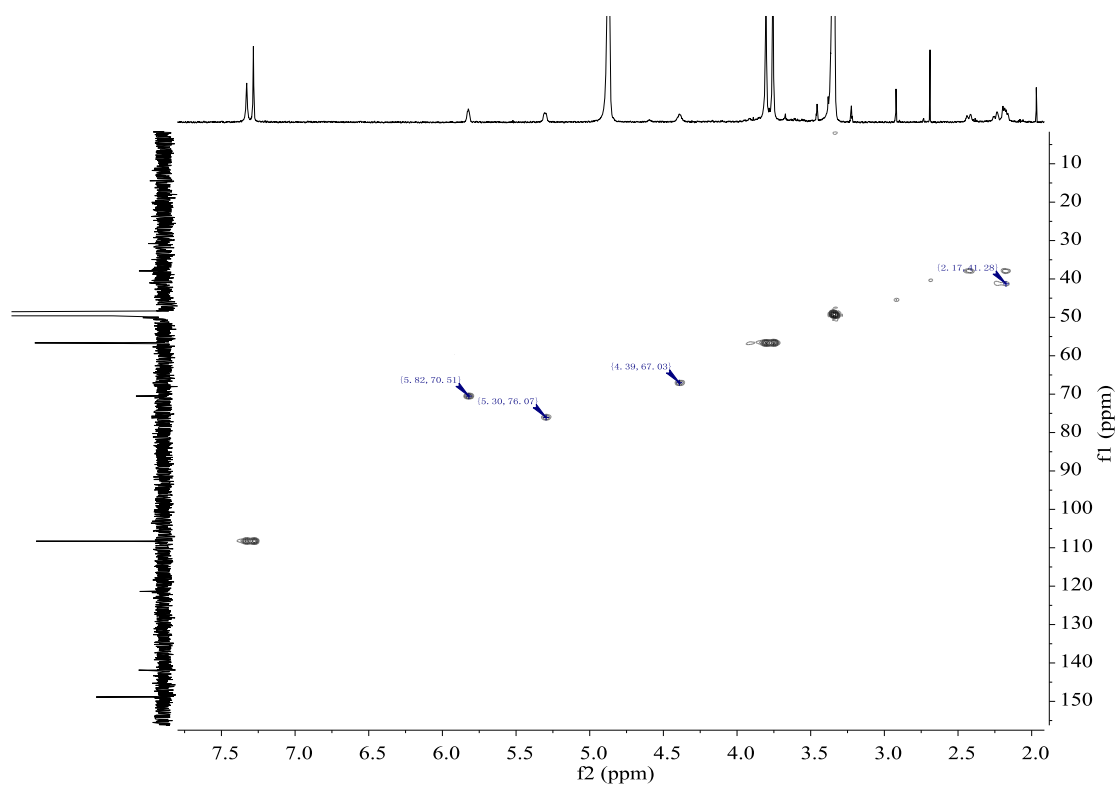

**Figure S24.** <sup>1</sup>H-<sup>1</sup>H COSY spectrum of **30** in CD<sub>3</sub>OD

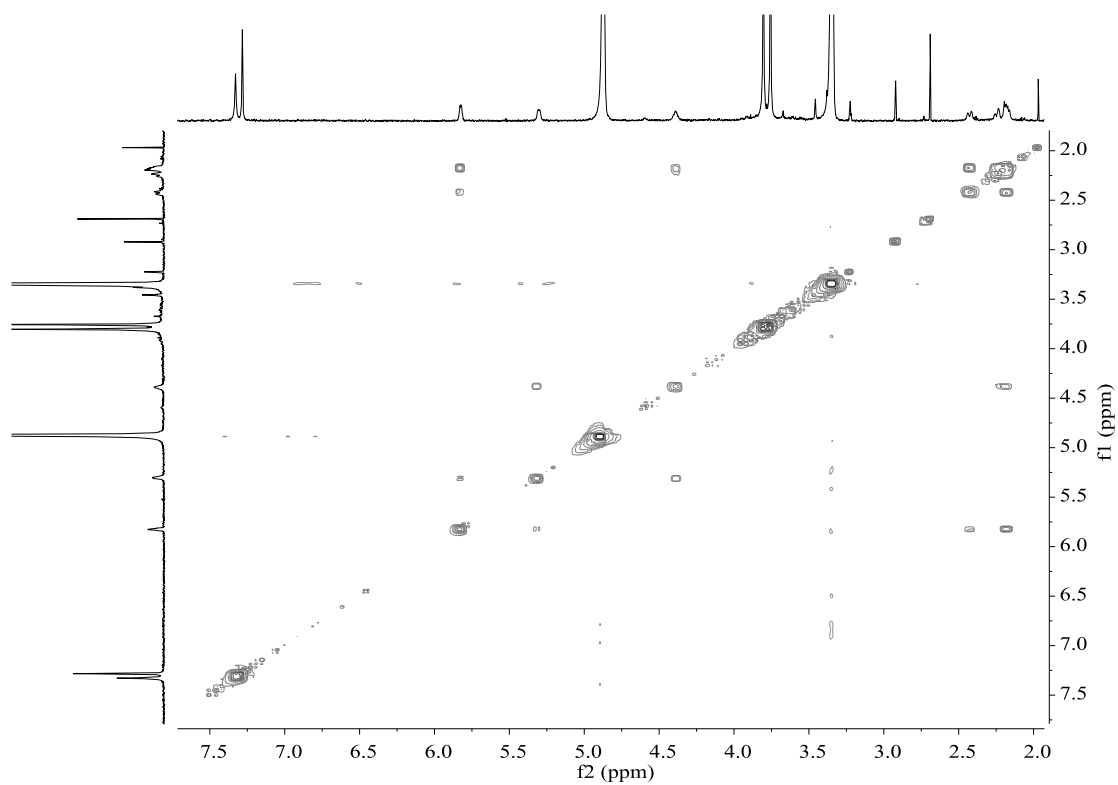

**Figure S25.** HMBC spectrum of **3** in CD<sub>3</sub>OD

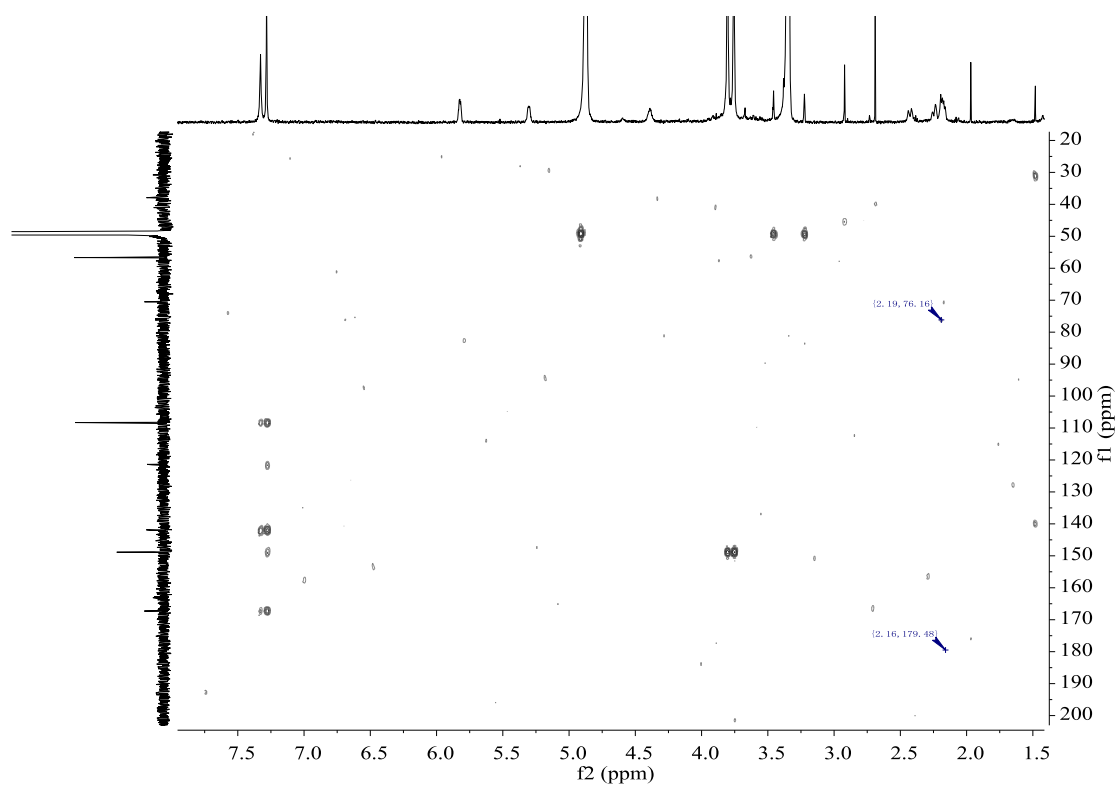

**Figure S26.** NOESY spectrum of **3** in CD<sub>3</sub>OD

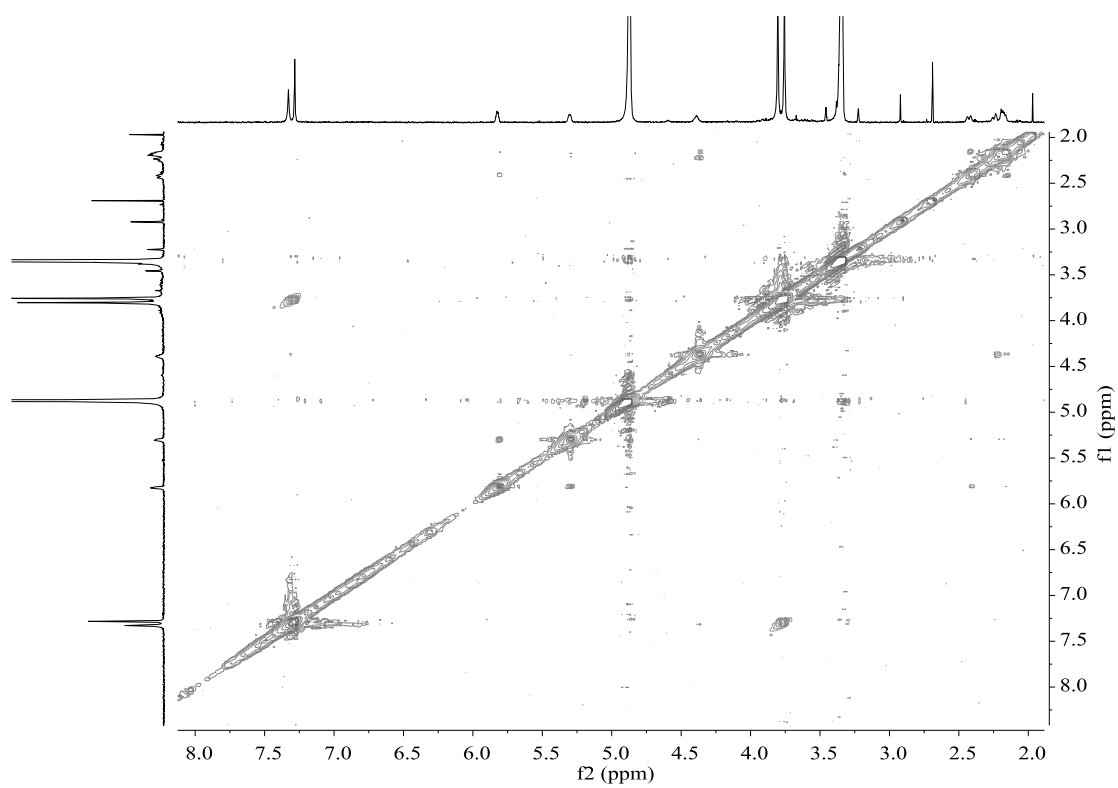

**Figure S27.** UV spectrum of **3** in CD<sub>3</sub>OD

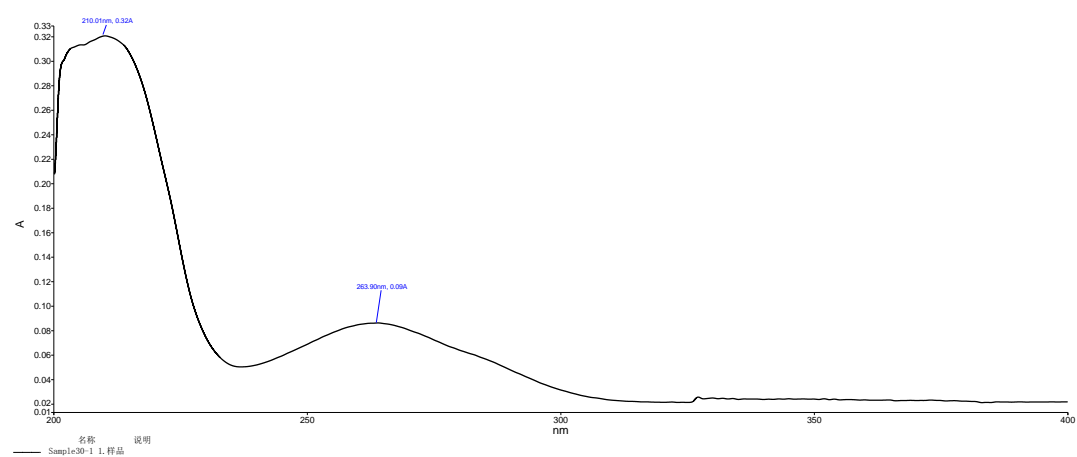



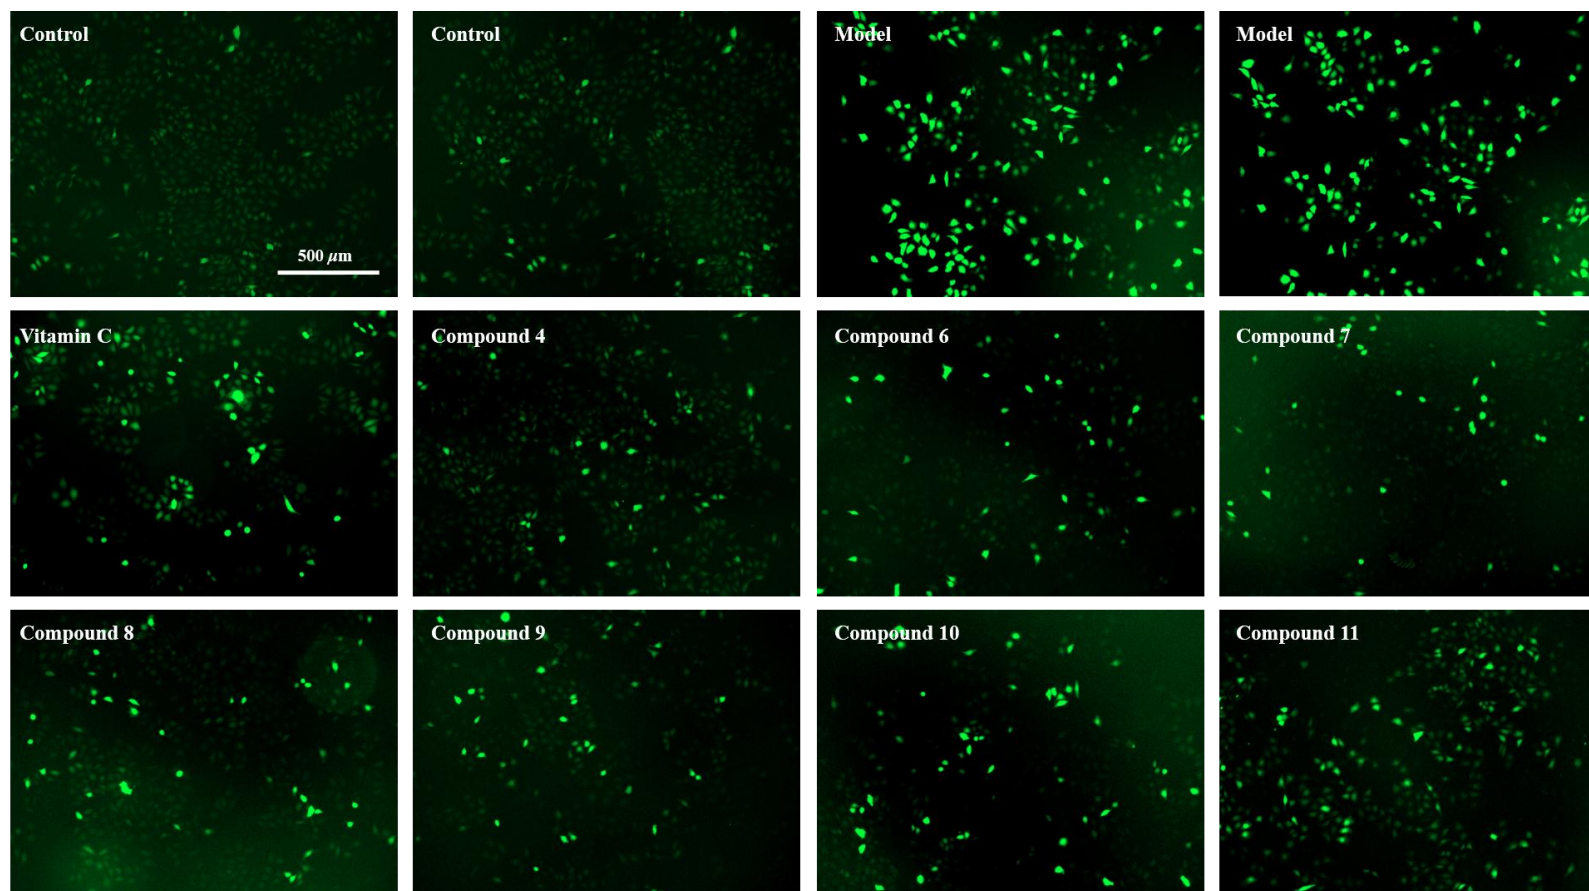

**Figure S28.** ROS production of compounds **4**, **6–11** and positive control vitamin C at 5  $\mu\text{M}$  in  $\text{H}_2\text{O}_2$ -induced L02 cell injury model shown in fluorescence images photographed by cell imaging multi-mode reader (Cytation 1, BioTek; scale bar: 500  $\mu\text{m}$ , 4  $\times$ )
